# Supplementary material
Source: MDPI journal article supplement (https://www.mdpi.com/2072-4292/14/3/680)
Supplement: s1 [file s1]

Archive with 2 entries (2 files):
- REVISED_Supplementary material_Drone based characterization_remotesensing-1545586.pdf
- Table S3A-3C_Confusion matrix of the classifications  performed.xlsx
