# Supplementary material
Source: MDPI journal article supplement (https://www.mdpi.com/2072-4292/14/3/680)
Supplement: s1 [file s1 › Table S3A-3C_Confusion matrix of the classifications performed.xlsx]

## Sheet: Table S3A_Benthic cover EM
*Table S3. Confusion matrix for benthic cover classification for nine nearshore study sites in Unguja island, Zanzibar
Site		Seagrass	Macroalgae	Bare	Corals	Total	User accuracy (%)
Bwejuu	Seagrass	24	2	1		27	88.9
	Macroalgae	1	15	3		19	78.9
	Bare	0	1	13		14	92.9
	Corals
	Total	25	18	17		60
	Producer accuracy (%)	96	83	76
	Overall accuracy (%)						86.7
	Kappa (%)						79.5
Chawani	Seagrass	41		4	1	46	89.1304
	Macroalgae	NA
	Bare	1		19	1	21	90.4762
	Corals	1		0	5	6	83.3333
	Total	43		23	7	73
	Producer accuracy (%)	95.3488		82.6087	71.4286
	Overall accuracy (%)						89.0411
	Kappa (%)						79.3347
Chumbe	Seagrass	18		1	1	20	90
	Macroalgae
	Bare	0		3	0	3	100
	Corals	2		2	5	9	55.5556
	Total	20		6	6	32
	Producer accuracy (%)	90		50	83.3333
	Overall accuracy (%)						81.2
	Kappa (%)						73.3
Chwaka	Seagrass	38		4		42	90.4762
	Macroalgae
	Bare	3		13		16	81.25
	Corals					0
	Total	41		17	0	58
	Producer accuracy (%)	92.7		76.5
	Overall accuracy (%)						87.931
	Kappa (%)						70.4
Jambiani	Seagrass	143		11		154	92.9
	Macroalgae
	Bare	8		32		40	80
	Corals
	Total	151		43	0	194
	Producer accuracy (%)	94.7		74.4
	Overall accuracy (%)						90.2
	Kappa (%)						90.2
Kwale	Seagrass	13	1	1	0	15	86.6667
	Macroalgae	3	20	0	0	23	86.9565
	Bare	0	0	10	2	12	83.3333
	Corals	1	0	1	3	5	60
	Total	17	21	12	5	55
	Producer accuracy (%)	76.4706	95.2381	83.3333	60
	Overall accuracy (%)						83.6
	Kappa (%)						76.6
Mnemba	Seagrass	11		0	1	12	0.916667
	Macroalgae
	Bare	0		9	1	10	0.9
	Corals	1		1	5	7	0.714286
	Total	12		10	7	29
	Producer accuracy (%)	0.916667		0.9	0.714286
	Overall accuracy (%)						86.7
	Kappa (%)						78.8
Tumbatu	Seagrass	72	4	2		78	92.3
	Macroalgae	16	52	3		71	73.2
	Bare	1	0	45		46	97.8
	Corals
	Total	89	56	50		195
	Producer accuracy (%)	80.9	92.9	90
	Overall accuracy (%)						86.6
	Kappa (%)						79.6
Uroa	Seagrass	72		3		75	96
	Macroalgae
	Bare	4		29		33	87.9
	Corals
	Total	76		32		108
	Producer accuracy (%)	0.947368		0.90625
	Overall accuracy (%)						94
	Kappa (%)						84.6
* The classes were seagrass, macroalgae, bare and corals; however, note all classes were present in all sites. If the class does not present its cell is lef blank. The overall accuracy and kappa is are indicated by light green fill.

## Sheet: Table S3B_Total cover_EM
*Table S3B: Confusion matrix for Seagrass total cover classification for nine nearshore study sites in Unguja island, Zanzibar
Site		Bare	1-10%	10-40%	40-70%	70-100%	Row Total	User Accuracy (%)
Bwejuu	Bare	9	1	0	0	0	10	90
	1-10%	2	8	1	0	0	11	72.7273
	10-40%	0	1	13	4	0	18	72.2222
	40-70%	0	0	1	10	1	12	83.3333
	70-100%	0	0	2	0	7	9	77.7778
	Column Total	11	10	17	2	8	60
	Producer accuracy (%)	81.8182	80	76.4706	71.4286	87.5
	Overall accuracy (%)							78.3333
	Kappa (%)							78.0455
Chapwani	Bare	15	3	0	0	0	18	83.3333
	1-10%	2	10	0	0	0	12	83.3333
	10-40%	0	1	5	0	0	6	83.3333
	40-70%	0	0	0	9	2	11	81.8182
	70-100%	0	0	1	1	23	25	92
	Column Total	17	14	6	10	25	72
	Producer accuracy (%)	88.2353	71.4286	83.3333	90	92
	Overall accuracy (%)							86.1111
	Kappa (%)							81.7212
Chumbe	Bare	5	2	0	0	0	7	71.4286
	1-10%	1	3	0	0	0	4	75
	10-40%	0	0	3	1	0	4	75
	40-70%	0	0	0	6	2	8	75
	70-100%	0	0	0	1	8	9	88.8889
	Column Total	6	5	3	8	10	32
	Producer accuracy (%)	83.3333	60	100	75	80
	Overall accuracy (%)							78.125
	Kappa (%)							71.8593
Chwaka	Bare	6	0	1	0	0	7	85.7143
	1-10%	2	10	0	0	2	14	71.4286
	10-40%	0	0	13	0	2	15	86.6667
	40-70%	0	1	1	9	1	12	75
	70-100%	0	0	0	2	8	10	80
	Column Total	8	11	15	11	13	58
	Producer accuracy (%)	75	90.9091	86.6667	81.8182	61.5385
	Overall accuracy (%)							79.3103
	Kappa (%)							79.0175
Jambiani	Bare	16	2	0	0	0	18	88.8889
	1-10%	1	34	5	4	0	44	77.2727
	10-40%	1	1	22	6	0	30	73.3333
	40-70%	1	5	6	53	6	71	74.6479
	70-100%	0	0	1	6	26	33	78.7879
	Column Total	19	42	34	69	32	196
	Producer accuracy (%)	84.2105	80.9524	64.7059	76.8116	81.25
	Overall accuracy (%)							77
	Kappa (%)							76.9
Mnemba	Bare	5	0	0	0	0	5	100
	1-10%	1	4	1	0	0	6	66.6667
	10-40%	0	3	2	0	0	5	40
	40-70%	0	1	0	5	0	6	83.3333
	70-100%	0	0	0	0	7	7	100
	Column Total	6	8	3	5	7	29
	Producer accuracy (%)	83.3333	50	66.6667	100	100
	Overall accuracy (%)							79.3103
	Kappa (%)							73.991
Kwale	Bare	18	2	0	0	1	21	85.7143
	1-10%	2	5	0	0	0	7	71.4286
	10-40%	0	0	5	0	3	8	62.5
	40-70%	0	0	0	6	2	8	75
	70-100%	0	0	1	1	9	11	81.8182
	Column Total	20	7	6	7	15	55
	Producer accuracy (%)	90	71.4286	83.3333	85.7143	60
	Overall accuracy (%)							78.1818
	Kappa (%)							77.8596
Tumbatu	Bare	37	2	1	2	2	44	84.0909
	1-10%	2	26	2	3	0	33	78.7879
	10-40%	1	0	24	3	2	30	80
	40-70%	0	0	3	36	9	48	75
	70-100%	0	0	0	2	38	40	95
	Column Total	40	28	30	46	51	195
	Producer accuracy (%)	92.5	92.8571	80	78.2609	74.5098
	Overall accuracy (%)							82.5641
	Kappa (%)							78.0703
Uroa	Bare	16	2	0	0	0	18	88.8889
	1-10%	2	18	2	1	0	23	78.2609
	10-40%	0	2	24	2	0	28	85.7143
	40-70%	1	1	1	7	1	11	63.6364
	70-100%	0	1	2	0	23	26	88.4615
	Column Total	19	24	29	10	24	106
	Producer accuracy (%)	84.2105	75	82.7586	70	95.8333	0
	Overall accuracy (%)							83.0189
	Kappa (%)							78.3723
*The overall accuracy and kappa is are indicated by light green fill.

## Sheet: Table_S3C_Species_cover EM
*Table S3C. Confusion matrix for species cover classification for nine nearshore study sites in Unguja island, Zanzibar
Site
Bwejuu		Macroalgae	CR	CS	TC	Row total	User accuracy
	Macroalgae	5	1	0	0	6	0.833333
	CR	0	15	4	1	20	0.75
	CS	0	8	17	1	26	0.653846
	TC	1	0	1	6	8	0.75
	Column total	6	24	2	8	60
	Producer accuracy	0.833333	0.625	0.772727	0.75		0.716667
	Overall accuracy						0.713194
	Kappa
Chapwani		H. Ovalis	C. Serrulata	T. Ciliatum	S. Isoetifolium	Row total	User accuracy
	H. Ovalis	7	2	0	0	9	0.777778
	C. Serrulata	2	18	4	0	24	0.75
	T. Ciliatum	0	6	24	1	31	0.774194
	S. Isoetifolium	1	0	0	7	8	0.875
	Column total	10	26	28	8	72
	Producer accuracy	0.7	0.692308	0.857143	0.875
	Overall accuracy						0.777778
	Kappa						0.674392
Chumbe		T. Ciliatum	S.I, CR, CS, TH	Bare, corals, pavement	Row Total	Row total	User accuracy
	T. Ciliatum	10	1	0	11	0.909091
	S.I, CR, CS, TH	2	9	2	13	0.692308
	Corals	0	2	6	8	0.75
	Column total	12	12	8	32
	Producer accuracy	0.833333	0.75	0.75
	Overall accuracy					0.78125
	Kappa					0.666667
Chwaka		EA	TC/TH	CR/CS	SI/HU	Row total	User accuracy
	EA	8	2	1	0	11	0.727273
	TC/TH	2	12	3	1	18	0.666667
	CR/CS	3	1	17	2	23	0.73913
	SI/HU	0	0	2	4	6	0.666667
	Column total	13	15	23	7	58
	Producer accuracy	0.615385	0.8	0.73913	0.571429
	Overall accuracy						0.706897
	Kappa						0.703227
Jambiani		CS/TH	CR/CS	HU/SI	Row total	User accuracy
	CS/TH	48	7	2	57	0.842105
	CR/CS	15	58	8	81	0.716049
	HU/SI	4	8	46	58	0.793103
	Column total	67	73	16	196
	Producer accuracy	0.716418	0.794521	0.821429
	Overall accuracy					0.77551
	Kappa					0.77
Mnemba		HU	CR/CS	TH/TC	Corals	Row total	User accuracy
	HU	8	0	1	0	9	0.888889
	CR/CS	1	5	0	0	6	0.833333
	TH/TC	0	0	5	1	6	0.833333
	Corals	1	1	2	5	9	0.555556
	Column total	10	6	8	6	30
	Producer accuracy	0.8	0.833333	0.625	0.833333
	Overall accuracy						0.766667
	Kappa						0.6875
Kwale	Bare	Macroalagae	CS/CR/TH	SI/TC	TC	Row total	User accuracy
	Macroalagae	11	2	1	0	14	0.785714
	CS/CR/TH	1	11	0	3	15	0.733333
	SI/TC	2	3	9	0	14	0.642857
	TC	1	2	1	8	12	0.666667
	Column Total	15	18	11	11	55
	Producer accuracy	0.733333	0.611111	0.818182	0.727273
	Overall accuracy						0.709091
	Kappa						0.705231
Tumbatu		E. acoroides	C. serrulata	C. rotundata	S. isoetifolium	H. Uninervis	Macroalgae	Row total	User accuracy
	E. acoroides	30	2	3	1	0	1	37	0.810811
	C. serrulata	1	21	2	2	2	0	28	0.75
	C. rotundata	3	0	16	0	7	1	27	0.592593
	S. isoetifolium	0	2	0	21	4	0	27	0.777778
	H. Uninervis	0	2	2	6	37	1	48	0.770833
	Macroalgae	0	2	3	0	3	13	21	0.619048
	Column total	34	29	26	30	53	23	195
	Producer accuracy	0.882353	0.724138	0.615385	0.7	0.698113	0.8125
	Overall accuracy								0.861538
	Kappa								0.695513
Uroa		SI	CR	TC	CS	Row total	User accuracy
	SI	15	1	2	1	19	0.789474
	CR	0	11	3	1	15	0.733333
	TC	0	4	21	3	28	0.75
	CS	7	2	1	34	44	0.772727
	Column total	22	18	27	39	106
	Producer accuracy	0.681818	0.611111	0.777778	0.871795
	Overall accuracy						0.764151
	Kappa						0.671867
* The classification was based on dominant species only. Species presented are: TC = Thalassodendron ciliatum; TH= Thalassia Hemprichii; CS = Cymodcea serrulata; CR = Cymodocea rotundata; HU = Halodule uninervis; SI = Syringodium isoetifolium; and EA = Enhalus acoroides. MA = macro-algae was also included during classification for this type. In some site it was important to form a common group be…
